# Supplementary material for: Concise nanotherapeutic modality for cancer involving graphene oxide dots in conjunction with ascorbic acid
Source: Royal Society of Chemistry journal article supplement (doi:10.1039/d3nr00431g), 2023-01-01
Supplement: d3nr00431g1.pdf [file d3nr00431g1.pdf]

## Electronic Supplementary Information

### **Concise Nanotherapeutic Modality for Cancer Involving Graphene Oxide**

#### **Dots in Conjunction with Ascorbic Acid**

Chun-Yan Shih,<sup>a, b, c</sup> Pei-Ting Wang,<sup>a, b, c</sup> Wei-Pang Chung,<sup>b, d</sup> Wen-Hsiu Wang,<sup>e</sup> I-Ting Chiang,<sup>b</sup> Wu-Chou Su,<sup>b, d</sup> Wei-Lun Huang,<sup>b, e \*</sup> and Hsisheng Teng<sup>a, b, c \*</sup>

a. Department of Chemical Engineering, National Cheng Kung University, Tainan 70101, Taiwan.

b. Center of Applied Nanomedicine, National Cheng Kung University, Tainan 70101, Taiwan.

c. Hierarchical Green-Energy Materials (Hi-GEM) Research Center, National Cheng Kung University, Tainan 70101, Taiwan

d. Department of Oncology, National Cheng Kung University Hospital, College of Medicine, National Cheng Kung University, Tainan 70101, Taiwan.

e. Department of Medical Laboratory Science and Biotechnology, College of Medicine, National Cheng Kung University, Tainan 70101, Taiwan.

\*Corresponding Authors

Wei-Lun Huang

E-mail: allenhuang@mail.ncku.edu.tw

Hsisheng Teng

E-mail: hteng@mail.ncku.edu.tw

## **Table of Contents**

1. Chemical structures of H<sub>2</sub>Asc derivatives
2. Chemical properties of NGODs
3. H<sub>2</sub>O<sub>2</sub> production in the presence of high concentrations of H<sub>2</sub>Asc
4. EPR for TEMPO-OH standard
5. HPLC spectrum of NGODs-H<sub>2</sub>Asc solutions
6. Biocompatibility of NGODs
7. Quantification of GSH depletion
8. Electronic band levels of NGODs determination
9. Determination of cell death mechanisms by Annexin V/PI assay
10. Determination of mitochondrial damage by TMRE assay

## 1. Chemical structures of H<sub>2</sub>Asc derivatives

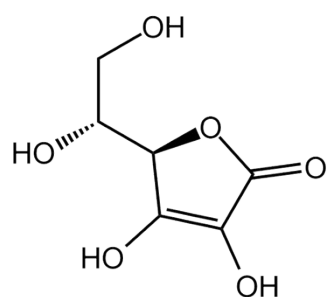

**Ascorbic acid (H<sub>2</sub>Asc)**

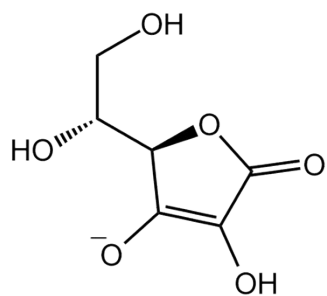

**Ascorbate (HAsc<sup>-</sup>)**

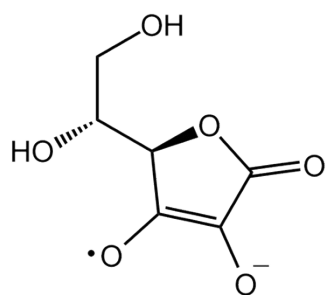

**Ascorbate radical (•Asc<sup>-</sup>)**

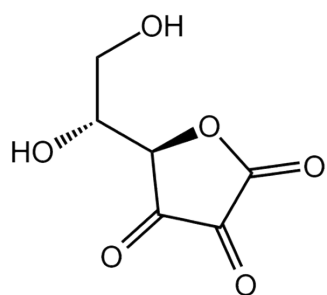

**Dehydroascorbic acid (dH-Asc)**

**Fig. S1.** Chemical structures of H<sub>2</sub>Asc derivatives.

## 2. Chemical properties of NGODs

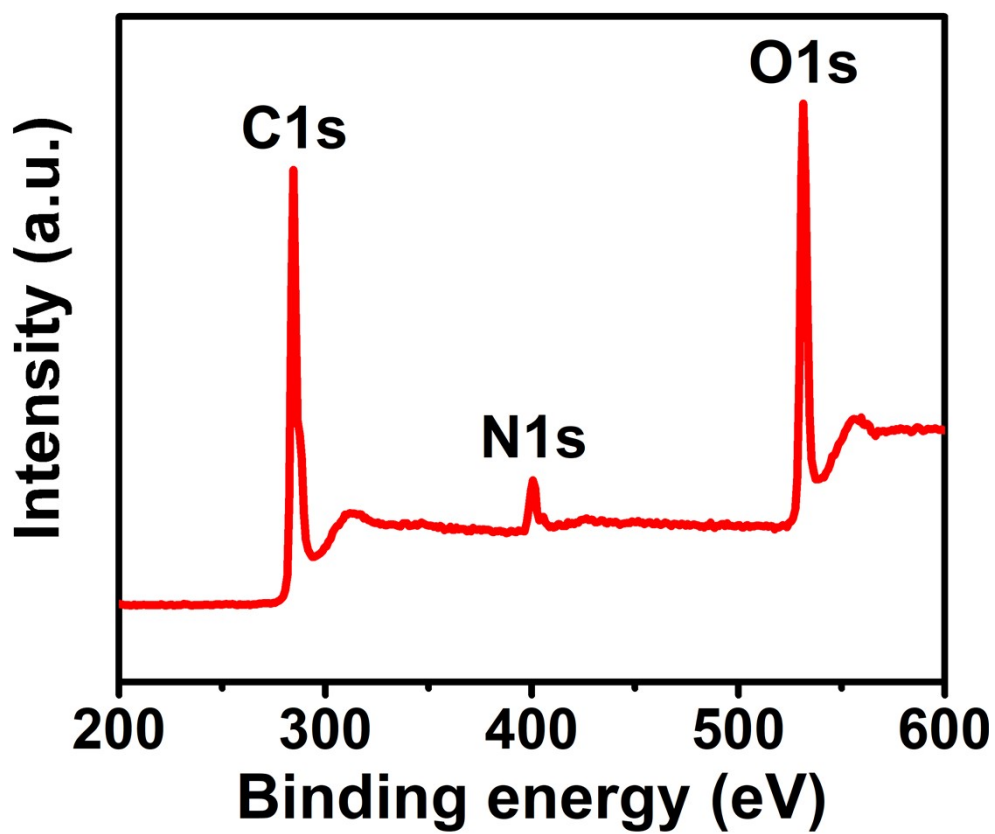

Fig. S2. Full-range XPS spectrum of NGODs.

**Table S1.** The (O 1s)/(C 1s) and (N 1s)/(C 1s) atomic ratios were derived from the full-range XPS spectrum (Fig. S1), the composition of carbon bonding was derived from the C 1s XPS spectrum (Fig. 1d) , and the composition of nitrogen functionality was derived from the N 1s XPS spectrum (Fig. 1c).

|       | Atomic ratio (%) | Carbon bonding composition (%) |      |      |      |       |
|-------|------------------|--------------------------------|------|------|------|-------|
|       | O 1s / C 1s      | C-C                            | C-N  | C-O  | C=O  | O-C=O |
| NGODs | 38.8             | 68.3                           | 3.93 | 10.8 | 15.2 | 1.76  |

|       | Atomic ratio (%) | Nitrogen functionality composition (% of C 1s) |          |           |          |
|-------|------------------|------------------------------------------------|----------|-----------|----------|
|       | N 1s / C 1s      | Pyridine                                       | Pyrrolic | Graphitic | Oxidized |
| NGODs | 7.96             | 0.43                                           | 2.24     | 4.22      | 1.06     |

### 3. H<sub>2</sub>O<sub>2</sub> production in the presence of high concentrations of H<sub>2</sub>Asc

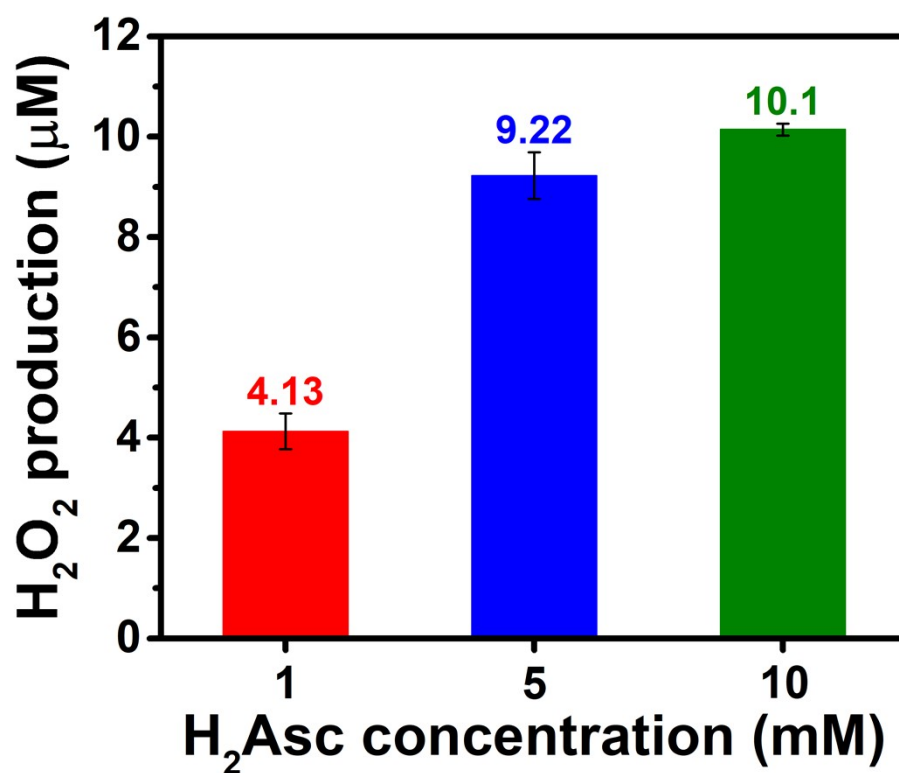

**Fig. S3.** H<sub>2</sub>O<sub>2</sub> production over different concentrations of H<sub>2</sub>Asc concentrations (1, 5, and 10 mM) in aqueous solution.

#### 4. EPR for TEMPO-OH standard

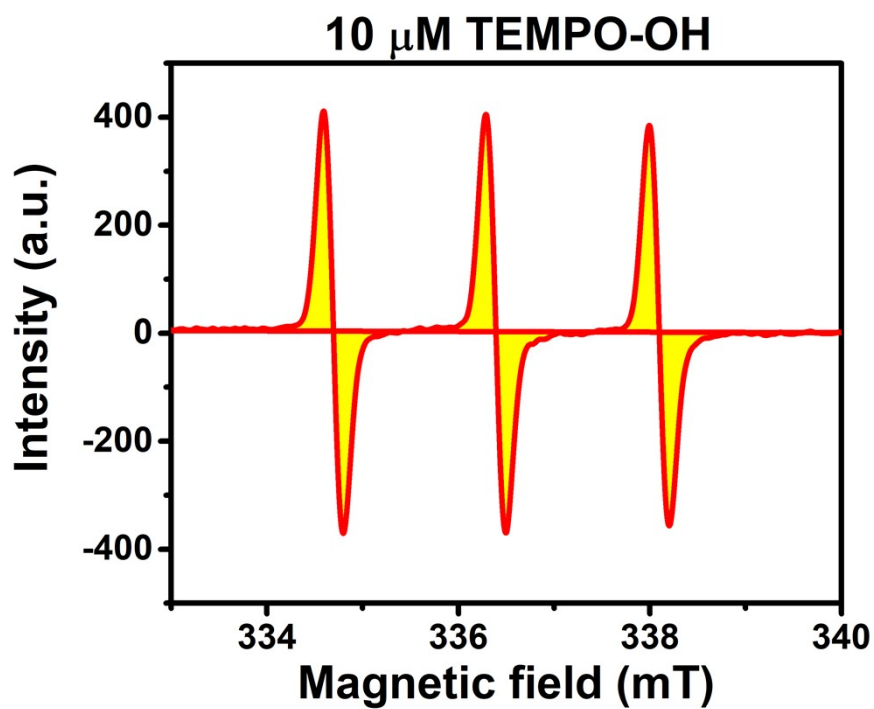

**Fig. S4.** EPR spectrum of 10  $\mu$ M TEMPO-OH (note: yellow area under curve integrated as a standard).

## 5. HPLC spectrum of NGODs-H<sub>2</sub>Asc solutions

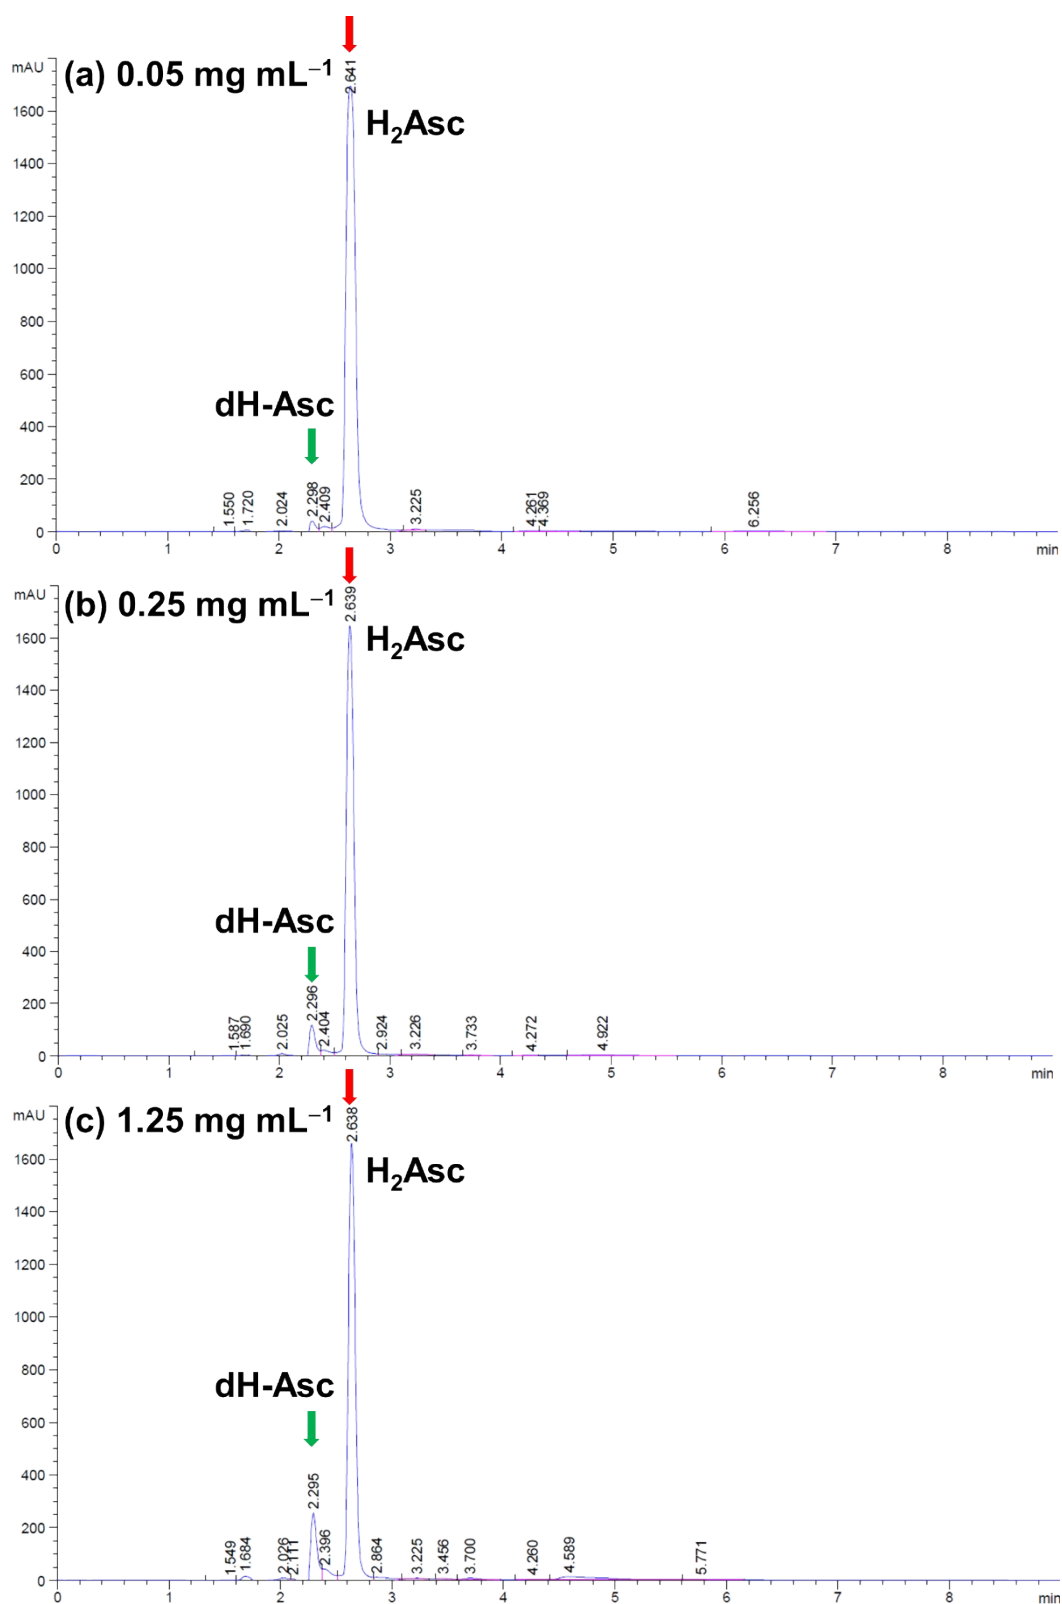

**Fig. S5.** HPLC spectra of H<sub>2</sub>Asc solutions (5 mM) after incubation with different concentrations of NGODs for 4 h: (a) 0.05 mg mL<sup>-1</sup>; (b) 0.25 mg mL<sup>-1</sup>; and (c) 1.25 mg mL<sup>-1</sup>.



## 6. Biocompatibility of NGODs

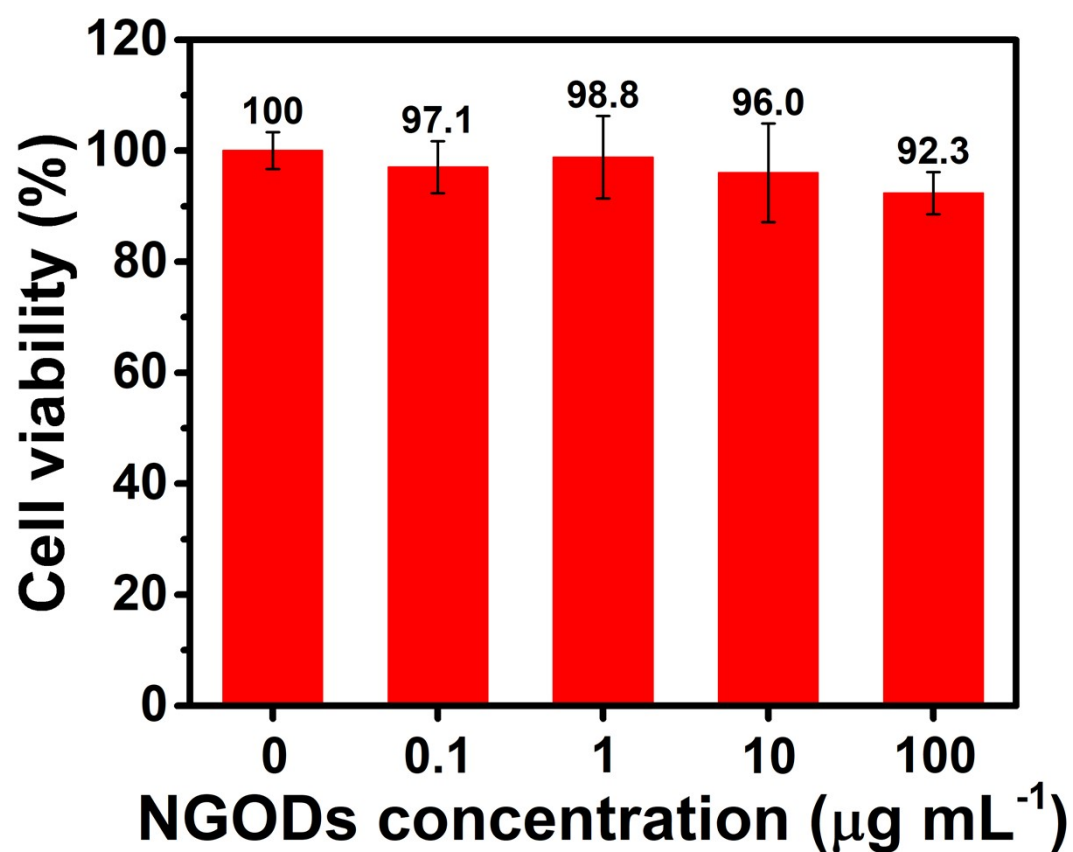

**Fig. S6.** Biocompatibility of NGODs with L929 cell in accordance with ISO 10993-5 standards where cell viability as a function of NGODs concentrations was determined via MTT assay at 24 h after NGODs treatment (note: plot presents mean values and error bars represent standard error).

## 7. Quantification of GSH depletion

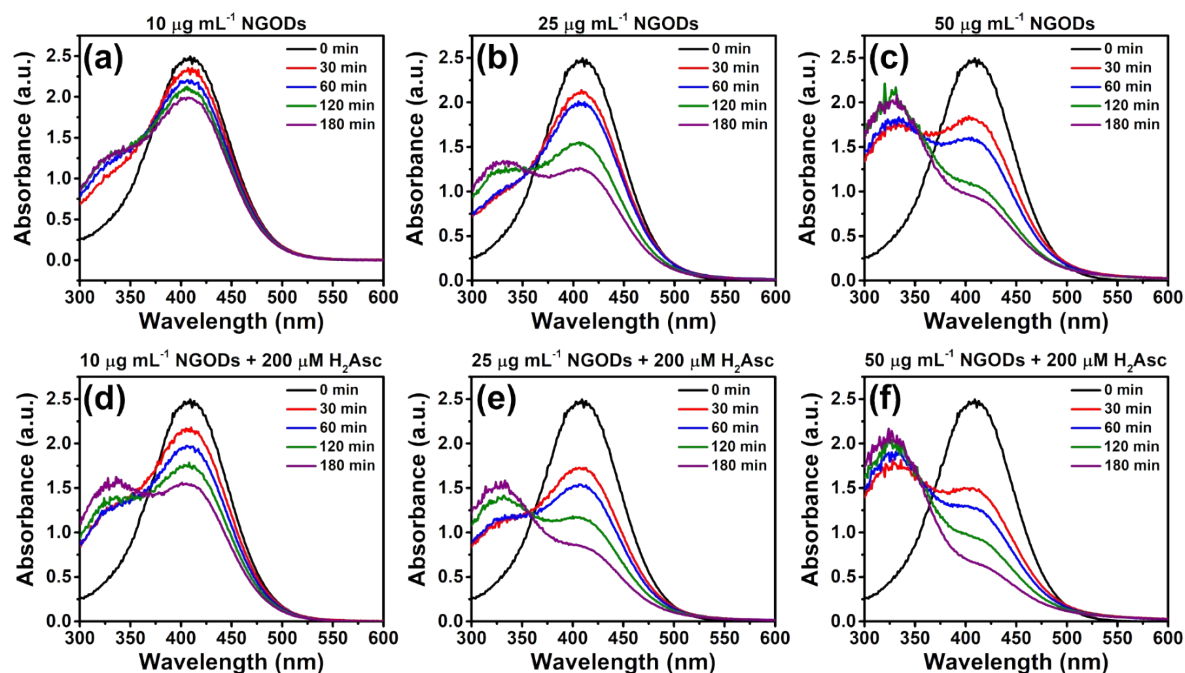

**Fig. S7.** Absorption spectra indicating GSH depletion over time (with respective GSH and DTNB concentrations of 1 mM and 0.5 mM): (a) NGOD–GSH–DTNB solution with 10 μg mL<sup>-1</sup> NGODs; (b) NGOD–GSH–DTNB solution with 25 μg mL<sup>-1</sup> NGODs; (c) NGOD–GSH–DTNB solution with 50 μg mL<sup>-1</sup> NGODs; (d) NGOD–H<sub>2</sub>Asc–GSH–DTNB solution with 10 μg mL<sup>-1</sup> NGODs; (e) NGOD–H<sub>2</sub>Asc–GSH–DTNB solution with 25 μg mL<sup>-1</sup> NGODs; (f) NGOD–H<sub>2</sub>Asc–GSH–DTNB solution with 50 μg mL<sup>-1</sup> NGODs and 200 μM H<sub>2</sub>Asc.

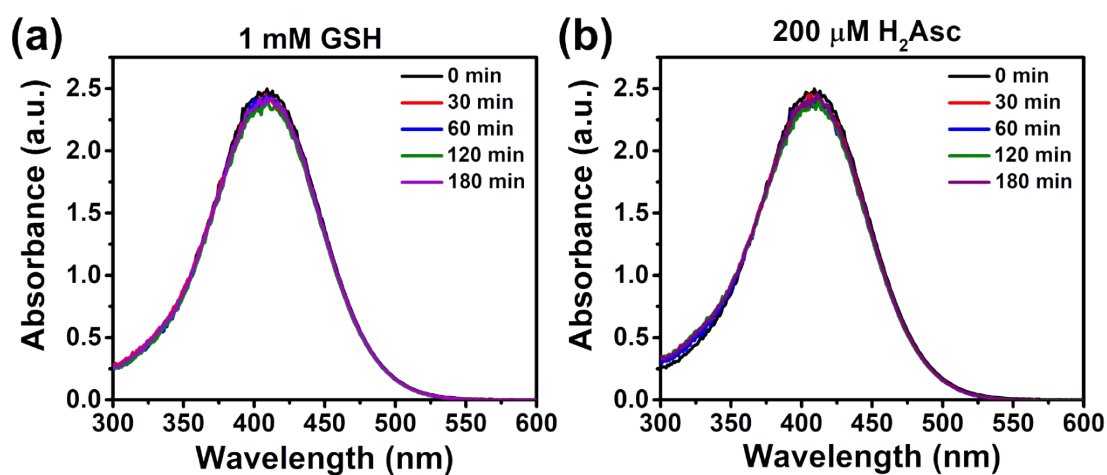

**Fig. S8** Variations in absorption spectra indicating GSH depletion over time (with respective GSH, DTNB, H<sub>2</sub>Asc concentrations of 1 mM, 0.5 mM, and 200 μM): (a) GSH–DTNB solution; (b) H<sub>2</sub>Asc–GSH–DTNB solution.

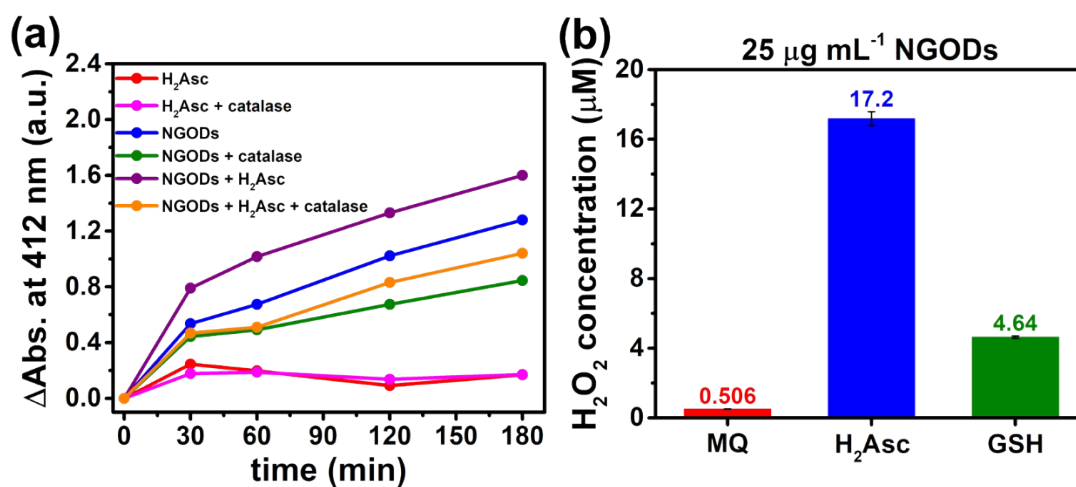

**Fig. S9** (a) Magnitude of decrease in TNB at 412 nm over time indicating GSH depletion with 1.5 U mL<sup>-1</sup> of catalase (where 1 U corresponds to the amount of enzyme that would decompose 1  $\mu$ mol H<sub>2</sub>O<sub>2</sub> per minute at pH 7.0 and 25 °C) and without catalase (with respective concentrations of H<sub>2</sub>Asc and NGODs of 200  $\mu$ M and 25  $\mu$ g mL<sup>-1</sup>); (b) H<sub>2</sub>O<sub>2</sub> production over NGODs in ultra-pure water (MQ), H<sub>2</sub>Asc, or GSH solution (with respective concentrations of NGODs, H<sub>2</sub>Asc, and GSH of 25  $\mu$ g mL<sup>-1</sup>, 200  $\mu$ M, and 1 mM).

## 8. Electronic band levels of NGODs determination

For electrochemical analysis, NGOD working electrodes were prepared by drop-casting NGODs aqueous solutions on fluorine-doped Tin Oxide (FTO) conducting glass substrates. NGOD electrodes electrochemical analysis was carried out in 0.5 M HNO<sub>3</sub> solution with a Pt wire counter and an Ag/AgCl (3 M KCl) reference electrodes. Linear scan voltammetric analysis was used to determine the VBM and CBM at a scanning rate 0.5 mV s<sup>-1</sup>. Fig. S10a,b show the anodic and cathodic scanning results indicating VBM and CBM values of 1.13 and -1.50 V (vs. Ag/AgCl), respectively. The calculated bandgap energy was 2.63 V based on this scan. Alternating current (AC) impedance spectroscopy (BioLogic VMP3, Germany) was performed to determine Fermi level (E<sub>F</sub>) potentials at a frequency of 45.409 kHz, based on the Mott-Schottky equation, in which a linear relationship between 1/C<sup>2</sup> and applied potential can be found. The Fermi level of NGODs was obtained from the intercept of the extrapolated straight line on the x-coordinate in Fig. S10c. Cyclic voltammetric analysis was conducted to determine the H<sub>2</sub>Asc oxidation potential. We subjected bare FTO conducting glass as a working electrode with a Pt wire counter and an Ag/AgCl (3 M KCl) reference in 0.5 M HNO<sub>3</sub> solution containing 500 μM H<sub>2</sub>Asc at scanning rate 10 mV s<sup>-1</sup>. Fig. S10d presents a cyclic voltammogram of H<sub>2</sub>Asc (500 μM) indicating an H<sub>2</sub>Asc oxidation potential of roughly 0.63 V (vs. Ag/AgCl). Fig. S10e presents energy-level diagrams of NGODs. The bandgap between the VBM and CBM (2.63 eV in width) encompassed the energy levels for H<sub>2</sub>Asc oxidation and O<sub>2</sub> reduction, indicating that NGODs are capable of catalyzing these two reactions under illumination.

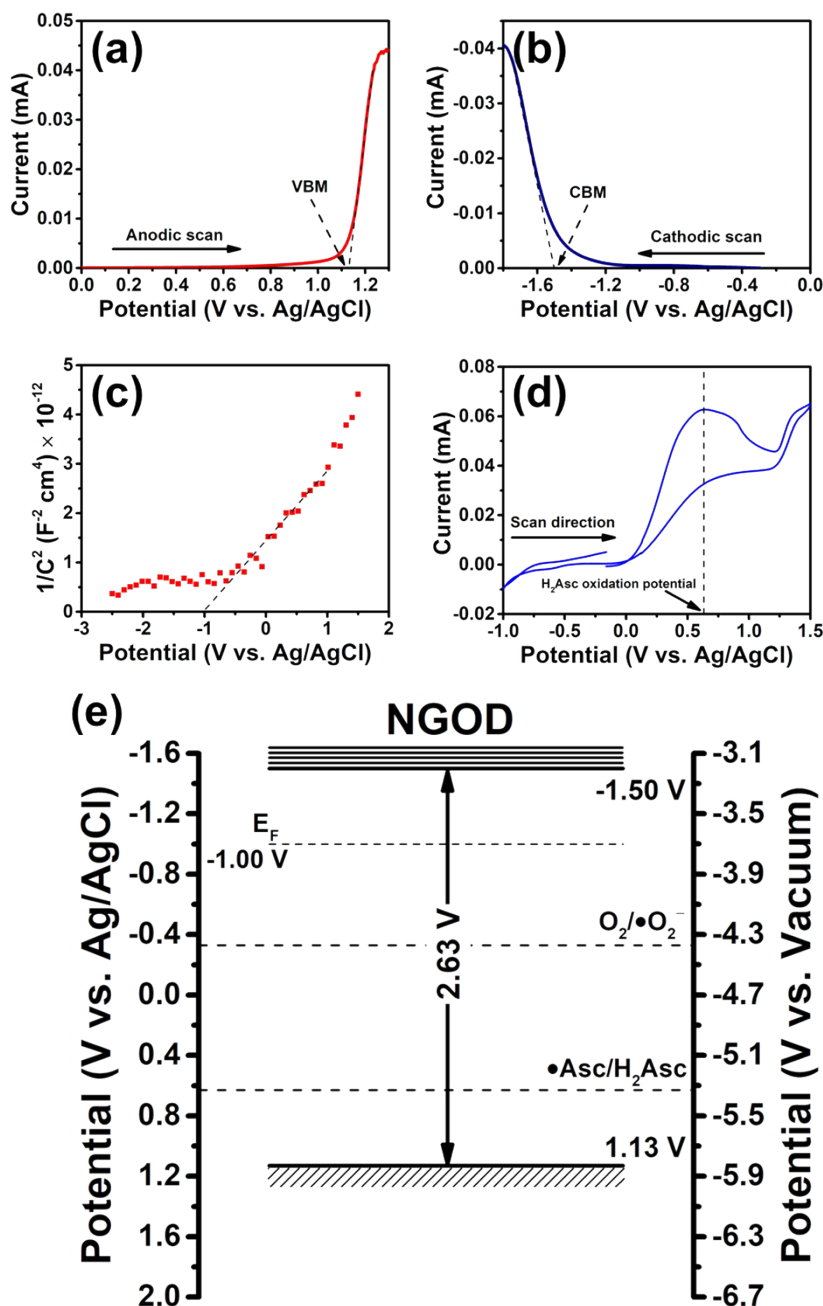

**Fig. S10.** Determining electronic band levels of NGODs: (a) anodic scanning to determine VBM at  $0.5 \text{ mV s}^{-1}$ ; (b) cathodic scanning to determine CBM at  $0.5 \text{ mV s}^{-1}$ ; (c) variations in capacitance ( $C$ ) of NGOD electrode under applied potential in  $0.1 \text{ M HNO}_3$  (which presented as the Mott-Schottky relationship and where capacitance was determined by electrochemical impedance spectroscopy and the Fermi level of NGODs was determined from the intercept of the extrapolated straight line on the abscissa); (d) cyclic voltammogram of  $500 \mu\text{M H}_2\text{Asc}$  in  $0.1 \text{ M HNO}_3$  at a scanning rate of  $10 \text{ mV s}^{-1}$ ; (e) schematic energy level diagrams of NGODs compared with potentials for  $\text{O}_2$  reduction and  $\text{H}_2\text{Asc}$  oxidation.

## 9. Determination of cell death mechanisms by Annexin V/PI assay

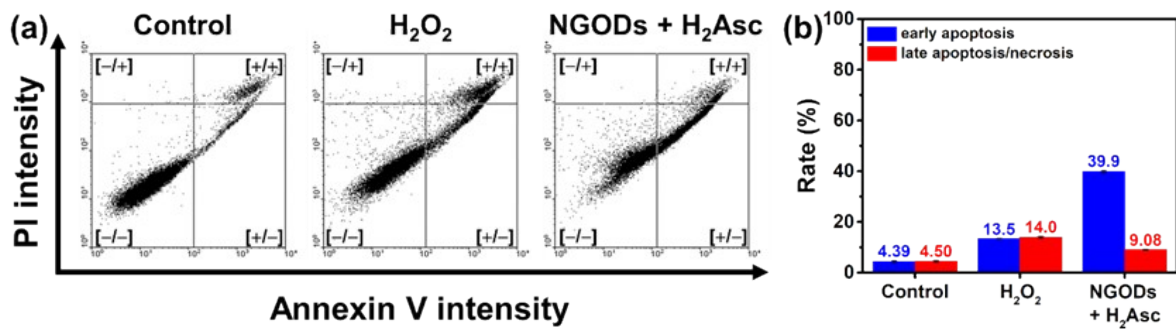

**Fig. S11** Determining the cell death mechanisms triggered by NGOD-enhanced H<sub>2</sub>Asc therapy using Annexin V/PI assay: (a) Cell populations in the early apoptotic and necrotic/late apoptotic stages were analyzed using Annexin V/PI assays. The distribution of cells in the control, positive control (100  $\mu$ M H<sub>2</sub>O<sub>2</sub>), and NGOD-enhanced H<sub>2</sub>Asc therapy-treated samples is shown on a plot of Annexin V against PI. (b) The ratios of early apoptotic and necrotic/late apoptotic populations after 24 h treatment are presented.

## 10. Determination of mitochondrial damage by TMRE assay

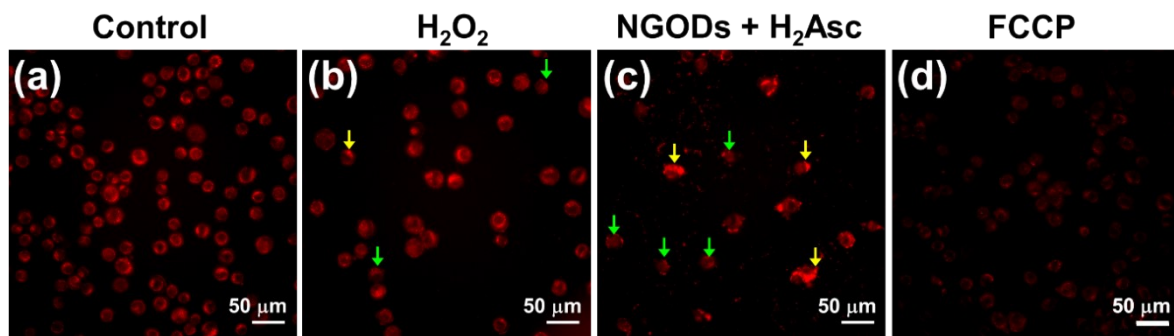

**Fig. S12** Mitochondrial damage induced by NGOD-enhanced H<sub>2</sub>Asc therapy was assessed using the tetramethylrhodamine ethyl ester (TMRE) assay. Representative TMRE fluorescence images of (a) untreated cells, (b) cells treated with 100 μM H<sub>2</sub>O<sub>2</sub>, (c) cells treated with NGOD-enhanced H<sub>2</sub>Asc therapy (10 μg mL<sup>-1</sup> NGODs with 200 μM H<sub>2</sub>Asc), and (d) cells treated with 200 μM carbonyl cyanide 4-(trifluoromethoxy) phenylhydrazone (FCCP), an ionophore uncoupler of oxidative phosphorylation, as a positive control, are shown.
